# Supplementary material for: Aqueous dispersion of single walled carbon nanotubes stabilized by PEG modified diperylene bisimide and their application as an antibacterial agent
Source: Royal Society of Chemistry journal article supplement (doi:10.1039/c7ra03570e), 2017-01-01
Supplement: c7ra03570e1.pdf [file c7ra03570e1.pdf]

# Aqueous Dispersion of Single Walled Carbon Nanotubes Stablized by PEG Modified Diperylene Bisimide and Their Application as an Antibacterial Agent

*Yan Sun,<sup>†‡</sup> Zhibo Li<sup>‡\*</sup>*

<sup>†</sup>College of Chemistry and Chemical Engineering, Yangzhou University, Yangzhou China, 225002,

<sup>‡</sup>School of Polymer Science and Engineering, Qingdao University of Science and Technology, Qingdao, China, 266042

It is difficult to observe the SWCNT due to the very small diameter and low contrast. In order to provide more detail of PEI-diPBI/SWCNT, three TEM images were provided.

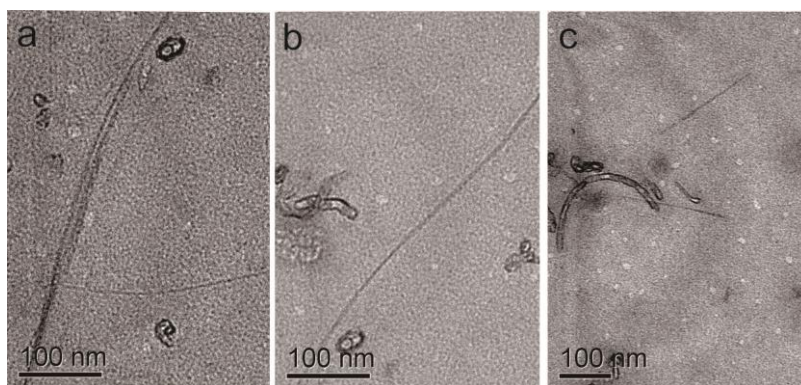

**Fig. S1 (a)-(c)** TEM image of SWCNT after the addition of PEG-diPBI ([PEG-diPBI] =1mg/ml, [SWCNT] =1 mg/ml).
